# Supplementary material for: Arabinoxylan and Pectin Metabolism in Crohn’s Disease Microbiota: An In Silico Study
Source: MDPI journal article supplement (doi:10.3390/ijms23137093), 2022-06-25
Supplement: s1 [file s1]

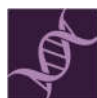

Supplementary Materials

# Arabinoxylan and Pectin Metabolism in Crohn's Disease Microbiota: An *In Silico* Study

Carlos Sabater <sup>1,2,\*</sup>, Inés Calvete-Torre <sup>1,2</sup>, Lorena Ruiz <sup>1,2</sup> and Abelardo Margolles <sup>1,2</sup>

<sup>1</sup> Department of Microbiology and Biochemistry of Dairy Products, Instituto de Productos Lácteos de Asturias-Consejo Superior de Investigaciones Científicas (IPLA-CSIC), Paseo Río Linares s/n, 33300 Villaviciosa, Asturias, Spain; ines.calvete@ipla.csic.es (I.C.-T.); lorena.ruiz@ipla.csic.es (L.R.); amargolles@ipla.csic.es (A.M.)

<sup>2</sup> Functionality and Ecology of Beneficial Microbes (MicroHealth) Group, Instituto de Investigación Sanitaria del Principado de Asturias (ISPA), 33011 Oviedo, Asturias, Spain

\* Correspondence: carlos.sabater@csic.es; Tel.: +34-985-892131

**Table S1.** Number of metagenome-assembled genomes (MAGs, n=198) recovered only from the microbiota of patients with Crohn's disease. MAGs were identified at family, genus, species or strain level (total number of different taxa n=25).

| MAGs found only in the microbiota of patients with Crohn's disease |            |
|--------------------------------------------------------------------|------------|
| Taxa                                                               | n          |
| <i>Parabacteroides distasonis</i>                                  | 62         |
| <i>Roseburia intestinalis</i> L1-82                                | 58         |
| <i>Veillonella</i>                                                 | 24         |
| <i>[Clostridium] bolteae</i>                                       | 11         |
| <i>Muribaculum</i> sp. TLL-A4                                      | 6          |
| <i>[Clostridium] saccharolyticum</i> WM1                           | 4          |
| <i>[Clostridium] sphenoides</i> JCM 1415                           | 4          |
| <i>Morganella morganii</i>                                         | 4          |
| Bacillaceae                                                        | 3          |
| <i>Proteus mirabilis</i> BB2000                                    | 3          |
| <i>Helicobacter canis</i>                                          | 2          |
| <i>Klebsiella variicola</i>                                        | 2          |
| <i>Proteus mirabilis</i> HI4320                                    | 2          |
| <i>Roseburia hominis</i>                                           | 2          |
| <i>[Clostridium] scindens</i> ATCC 35704                           | 1          |
| <i>Actinomyces</i> sp. oral taxon 414                              | 1          |
| <i>Bifidobacterium asteroides</i>                                  | 1          |
| <i>Bifidobacterium dentium</i>                                     | 1          |
| <i>Flintibacter</i> sp. KGMB00164                                  | 1          |
| <i>Fusobacterium necrophorum</i> subsp. <i>funduliforme</i>        | 1          |
| <i>Massilistercora timonensis</i>                                  | 1          |
| <i>Muribaculum</i> sp. H5                                          | 1          |
| <i>Olsenella</i> sp. GAM18                                         | 1          |
| Rhodobacteraceae                                                   | 1          |
| <i>Streptococcus lutetiensis</i> 033                               | 1          |
| <b>Total</b>                                                       | <b>198</b> |

**Table S2.** Number of metagenome-assembled genomes (MAGs, n=216) recovered only from the microbiota of healthy individuals. MAGs were identified at family, genus, species or strain level (total number of different taxa n=42).

| MAGs found only in the microbiota of healthy individuals |            |
|----------------------------------------------------------|------------|
| Taxa                                                     | n          |
| <i>Parabacteroides</i>                                   | 54         |
| <i>Clostridium</i>                                       | 34         |
| <i>Roseburia</i>                                         | 20         |
| <i>Muribaculum</i>                                       | 18         |
| <i>Bifidobacterium adolescentis</i> ATCC 15703           | 14         |
| <i>Acidaminococcus fermentans</i> DSM 20731              | 6          |
| <i>Brachyspira murdochii</i> DSM 12563                   | 5          |
| <i>Desulfovibrio piger</i>                               | 5          |
| <i>Faecalitalea cylindroides</i> T2-87                   | 5          |
| <i>Lactobacillus ruminis</i> ATCC 27782                  | 4          |
| <i>Methanobrevibacter smithii</i> ATCC 35061             | 4          |
| <i>Streptococcus thermophilus</i>                        | 4          |
| <i>Veillonella atypica</i>                               | 4          |
| <i>Clostridioides difficile</i>                          | 3          |
| <i>Lactobacillus mucosae</i> LM1                         | 3          |
| <i>Veillonella parvula</i> HSIVP1                        | 3          |
| Burkholderiaceae                                         | 2          |
| <i>Cutibacterium acnes</i>                               | 2          |
| <i>Lactobacillus fermentum</i>                           | 2          |
| <i>Turicibacter</i> sp. H121                             | 2          |
| <i>Absiella</i>                                          | 1          |
| Acidaminococcaceae                                       | 1          |
| <i>Adlercreutzia equolifaciens</i> DSM 19450             | 1          |
| <i>Bifidobacterium animalis</i> subsp. <i>animalis</i>   | 1          |
| <i>Bifidobacterium bifidum</i> BGN4                      | 1          |
| <i>Butyricimonas faecalis</i>                            | 1          |
| <i>Campylobacter concisus</i> 13826                      | 1          |
| Clostridiales Family XIII. Incertae Sedis                | 1          |
| <i>Fusobacterium ulcerans</i> ATCC 49185                 | 1          |
| <i>Lactobacillus amylovorus</i> DSM 20531                | 1          |
| <i>Lactobacillus salivarius</i> str. Ren                 | 1          |
| Methanomassiliicoccaceae archaeon DOK                    | 1          |
| Muribaculaceae bacterium DSM 108610                      | 1          |
| <i>Oscillibacter</i> sp. PEA192                          | 1          |
| Oscillospiraceae                                         | 1          |
| <i>Paenibacillus</i>                                     | 1          |
| Rhodospirillaceae                                        | 1          |
| <i>Selenomonas sputigena</i> ATCC 35185                  | 1          |
| <i>Streptococcus salivarius</i> JIM8777                  | 1          |
| <i>Succinivibrio dextrinosolvens</i>                     | 1          |
| <i>Veillonella dispar</i>                                | 1          |
| Victivallales bacterium CCUG 44730                       | 1          |
| <b>Total</b>                                             | <b>216</b> |

**Table S3.** Enzyme domains acting on arabinoxylan (AX) and pectin annotated in metagenome-assembled genomes (MAGs) recovered from the microbiota of patients with Crohn's disease. These MAGs were assigned to taxonomic clades that were also found in the microbiota of healthy individuals.

| Domain  | Acting on  | Potential activities of interest                                             |
|---------|------------|------------------------------------------------------------------------------|
| CBM2    | AX         | Xylanase                                                                     |
| CBM4    | AX         | Xylanase                                                                     |
| CBM35   | AX         | Xylanase                                                                     |
| GH5 2   | AX         | Endo- $\beta$ -1,4-xylanase                                                  |
| GH5 4   | AX         | Endo- $\beta$ -1,4-xylanase                                                  |
| GH5 21  | AX         | Endo- $\beta$ -1,4-xylanase                                                  |
| GH8     | AX         | Endo- $\beta$ -1,4-xylanase                                                  |
| GH10    | AX         | Arabinoxylan-specific endo- $\beta$ -1,4-xylanase                            |
| GH30 8  | AX         | Glucuronoarabinoxylan-specific endo- $\beta$ -1,4-xylanase                   |
| GH30 1  | AX         | Endo- $\beta$ -1,4-xylanase; $\beta$ -xylosidase                             |
| GH120   | AX         | $\beta$ -xylosidase                                                          |
| GH115   | AX         | Xylan $\alpha$ -1,2-glucuronidase                                            |
| CE1     | AX         | Acetyl xylan esterase                                                        |
| CE2     | AX         | Acetyl xylan esterase                                                        |
| CE3     | AX         | Acetyl xylan esterase                                                        |
| CE4     | AX         | Acetyl xylan esterase                                                        |
| CE6     | AX         | Acetyl xylan esterase                                                        |
| CE7     | AX         | Acetyl xylan esterase                                                        |
| GH3     | AX; pectin | Xylan 1,4- $\beta$ -xylosidase; $\alpha$ -L-arabinofuranosidase              |
| GH43 10 | AX; pectin | Xylan 1,4- $\beta$ -xylosidase; $\alpha$ -L-arabinofuranosidase              |
| GH43 11 | AX; pectin | Xylan 1,4- $\beta$ -xylosidase; $\alpha$ -L-arabinofuranosidase              |
| GH43 12 | AX; pectin | Xylan 1,4- $\beta$ -xylosidase; $\alpha$ -L-arabinofuranosidase              |
| GH43 9  | AX; pectin | $\alpha$ -L-arabinofuranosidase                                              |
| GH43 16 | AX; pectin | $\alpha$ -L-arabinofuranosidase                                              |
| GH43 19 | AX; pectin | $\alpha$ -L-arabinofuranosidase                                              |
| GH43 26 | AX; pectin | $\alpha$ -L-arabinofuranosidase                                              |
| GH43 18 | AX; pectin | $\alpha$ -L-arabinofuranosidase                                              |
| GH43 33 | AX; pectin | $\alpha$ -L-arabinofuranosidase                                              |
| GH43 34 | AX; pectin | $\beta$ -D-galactofuranosidase; $\alpha$ -L-arabinofuranosidase              |
| GH98    | AX; pectin | Endo- $\beta$ -1,4-galactosidase; endo- $\beta$ -1,4-xylanase                |
| GH1     | AX; pectin | $\beta$ -galactosidase; $\beta$ -xylosidase                                  |
| GH2     | AX; pectin | $\beta$ -galactosidase; $\alpha$ -L-arabinofuranosidase; $\beta$ -xylosidase |
| GH39    | AX; pectin | $\beta$ -galactosidase; $\alpha$ -L-arabinofuranosidase; $\beta$ -xylosidase |
| GH43 1  | AX; pectin | $\beta$ -galactosidase; $\alpha$ -L-arabinofuranosidase; $\beta$ -xylosidase |
| CE12    | AX; pectin | Acetyl xylan esterase; pectin acetyl esterase                                |

|        |        |                                          |
|--------|--------|------------------------------------------|
| GH42   | Pectin | $\beta$ -galactosidase                   |
| CBM32  | Pectin | Polygalacturonase                        |
| GH78   | Pectin | $\alpha$ -L-rhamnosidase                 |
| GH105  | Pectin | Unsaturated rhamnogalacturonyl hydrolase |
| CE8    | Pectin | Pectin methylesterase                    |
| PL11 1 | Pectin | Rhamnogalacturonan endo- / exolyase      |
| PL26   | Pectin | Rhamnogalacturonan exolyase              |

**Table S4.** Enzyme domains acting on arabinoxylan (AX) and pectin annotated in metagenome-assembled genomes (MAGs) recovered from the microbiota of healthy individuals. These MAGs were assigned to taxonomic clades that were also found in the microbiota of patients with Crohn's disease.

| Domain  | Acting on  | Potential activities of interest                                |
|---------|------------|-----------------------------------------------------------------|
| CBM4    | AX         | Xylanase                                                        |
| CBM35   | AX         | Xylanase                                                        |
| GH5 2   | AX         | Endo-b-1,4-xylanase                                             |
| GH5 4   | AX         | Endo-b-1,4-xylanase                                             |
| GH5 21  | AX         | Endo- $\beta$ -1,4-xylanase                                     |
| GH5 54  | AX         | Endo-b-1,4-xylanase                                             |
| GH8     | AX         | Endo- $\beta$ -1,4-xylanase                                     |
| GH10    | AX         | Arabinoxylan-specific endo- $\beta$ -1,4-xylanase               |
| GH30 8  | AX         | Glucuronoarabinoxylan-specific endo- $\beta$ -1,4-xylanase      |
| GH120   | AX         | $\beta$ -xylosidase                                             |
| GH115   | AX         | Xylan $\alpha$ -1,2-glucuronidase                               |
| CE1     | AX         | Acetyl xylan esterase                                           |
| CE2     | AX         | Acetyl xylan esterase                                           |
| CE3     | AX         | Acetyl xylan esterase                                           |
| CE4     | AX         | Acetyl xylan esterase                                           |
| CE6     | AX         | Acetyl xylan esterase                                           |
| CE7     | AX         | Acetyl xylan esterase                                           |
| AA10    | AX         | Xylan oxidase                                                   |
| GH3     | AX; pectin | Xylan 1,4- $\beta$ -xylosidase; $\alpha$ -L-arabinofuranosidase |
| GH43 10 | AX; pectin | Xylan 1,4- $\beta$ -xylosidase; $\alpha$ -L-arabinofuranosidase |
| GH43 11 | AX; pectin | Xylan 1,4- $\beta$ -xylosidase; $\alpha$ -L-arabinofuranosidase |
| GH43 12 | AX; pectin | Xylan 1,4- $\beta$ -xylosidase; $\alpha$ -L-arabinofuranosidase |
| GH43 27 | AX; pectin | Xylan 1,4- $\beta$ -xylosidase; $\alpha$ -L-arabinofuranosidase |
| GH43 9  | AX; pectin | $\alpha$ -L-arabinofuranosidase                                 |
| GH43 16 | AX; pectin | $\alpha$ -L-arabinofuranosidase                                 |
| GH43 18 | AX; pectin | $\alpha$ -L-arabinofuranosidase                                 |
| GH43 19 | AX; pectin | $\alpha$ -L-arabinofuranosidase                                 |
| GH43 26 | AX; pectin | $\alpha$ -L-arabinofuranosidase                                 |
| GH43 33 | AX; pectin | $\alpha$ -L-arabinofuranosidase                                 |
| GH43 17 | AX; pectin | $\alpha$ -L-arabinofuranosidase; endo- $\beta$ -1,4-xylanase    |

|         |            |                                                                              |
|---------|------------|------------------------------------------------------------------------------|
| GH43 34 | AX; pectin | $\beta$ -D-galactofuranosidase; $\alpha$ -L-arabinofuranosidase              |
| GH98    | AX; pectin | Endo- $\beta$ -1,4-galactosidase; endo- $\beta$ -1,4-xylanase                |
| GH1     | AX; pectin | $\beta$ -galactosidase; $\beta$ -xylosidase                                  |
| GH2     | AX; pectin | $\beta$ -galactosidase; $\alpha$ -L-arabinofuranosidase; $\beta$ -xylosidase |
| GH43 1  | AX; pectin | $\beta$ -galactosidase; $\alpha$ -L-arabinofuranosidase; $\beta$ -xylosidase |
| CE12    | AX; pectin | Acetyl xylan esterase; pectin acylesterase                                   |
| CBM51   | Pectin     | Galactosidase                                                                |
| GH42    | Pectin     | $\beta$ -galactosidase                                                       |
| CBM32   | Pectin     | Polygalacturonase                                                            |
| GH28    | Pectin     | Exopolygalacturonase; rhamnogalacturonase                                    |
| GH78    | Pectin     | $\alpha$ -L-rhamnosidase                                                     |
| GH105   | Pectin     | Unsaturated rhamnogalacturonyl hydrolase                                     |
| CE8     | Pectin     | Pectin methylesterase                                                        |
| PL11 1  | Pectin     | Rhamnogalacturonan endo- / exolyase                                          |
| PL26    | Pectin     | Rhamnogalacturonan exolyase                                                  |
| PL9 1   | Pectin     | Exopolygalacturonate lyase; rhamnogalacturonan endolyase                     |

**Table S5.** Enzyme domains acting on arabinoxylan (AX), pectin and other carbohydrates (Other) an-notated in metagenome-assembled genomes (MAGs) recovered from the microbiota of patients with Crohn's disease. These enzyme domains were not found in MAGs recovered from metagenome samples from healthy individuals.

| Domain | Acting on  | Potential activities of interest |
|--------|------------|----------------------------------|
| CBM54  | AX         | Xylanase                         |
| CBM42  | AX; pectin | Arabinofuranosidase              |
| PL4    | Pectin     | Rhamnogalacturonan endolyase     |
| CBM20  | Other      | Starch-binding enzyme            |
| CBM46  | Other      | Cellulase                        |
| CBM69  | Other      | Starch-binding enzyme            |
| PL13   | Other      | Heparin lyase                    |
| PL15 2 | Other      | Heparin lyase                    |
| PL17 1 | Other      | Oligoalginate lyase              |

**Table S6.** Enzyme domains acting on arabinoxylan (AX), pectin and other carbohydrates (Other) annotated in metagenome-assembled genomes (MAGs) recovered from the microbiota of healthy individuals. These enzyme domains were not found in MAGs recovered from metagenome samples from patients with Crohn's disease.

| Domain  | Acting on | Potential activities of interest                          |
|---------|-----------|-----------------------------------------------------------|
| GH11    | AX        | Endo- $\beta$ -1,4-xylanase; exo-1,4- $\beta$ -xylosidase |
| PL1 6   | Pectin    | Pectin lyase                                              |
| PL9 2   | Pectin    | Pectin lyase                                              |
| PL2 2   | Pectin    | Exo-polygalacturonate lyase                               |
| PL11 2  | Pectin    | Rhamnogalacturonan endo- / exolyase                       |
| PL4 4   | Pectin    | Rhamnogalacturonan endolyase                              |
| CBM21   | Other     | Starch-binding enzyme                                     |
| CBM25   | Other     | Starch-binding enzyme                                     |
| CBM63   | Other     | Cellulase                                                 |
| CBM68   | Other     | Pullulanase                                               |
| GH13 33 | Other     | Trehalose synthase                                        |
| GH23    | Other     | Lysozyme type G                                           |
| GH48    | Other     | Cellobiohydrolase                                         |
| GH5 48  | Other     | Chitosanase                                               |
| GT87    | Other     | $\alpha$ -1,2-mannosyltransferase                         |

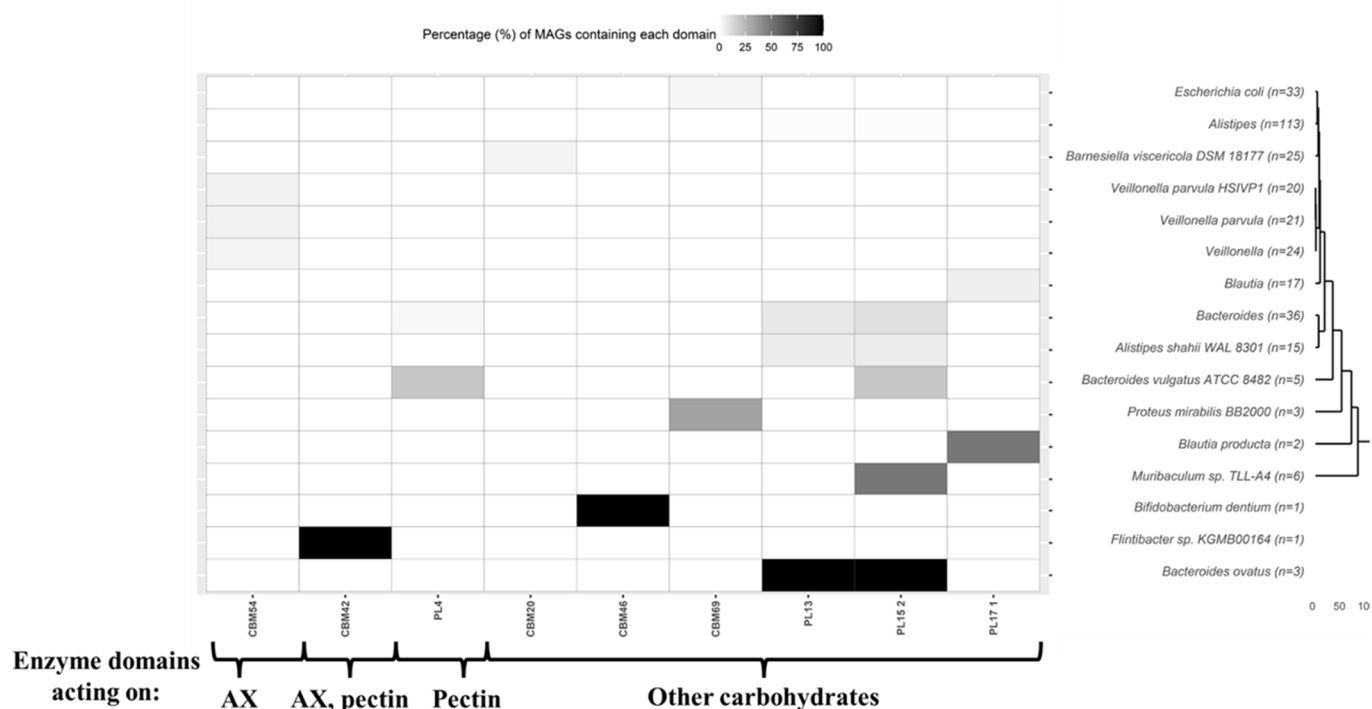

**Figure S1.** Heatmap showing the presence of different glycosidases (indicated as black cells) in metagenome-assembled genomes (MAGs) recovered only from the microbiota of patients with Crohn's disease (see Table S5). These enzyme domains were not found in MAGs recovered from metagenome samples from healthy individuals. The percentage (%) of MAGs containing each functional domain is shown. Specifically, glycosidases capable of degrading arabinoxylan (AX), pectin and other carbohydrates are illustrated. Glycosidase functional domains showing coverage values higher than 0.95 were annotated. Codes corresponding to the Carbohydrate-Active enZYmes Database (CAZy) family of each enzyme have been assigned.

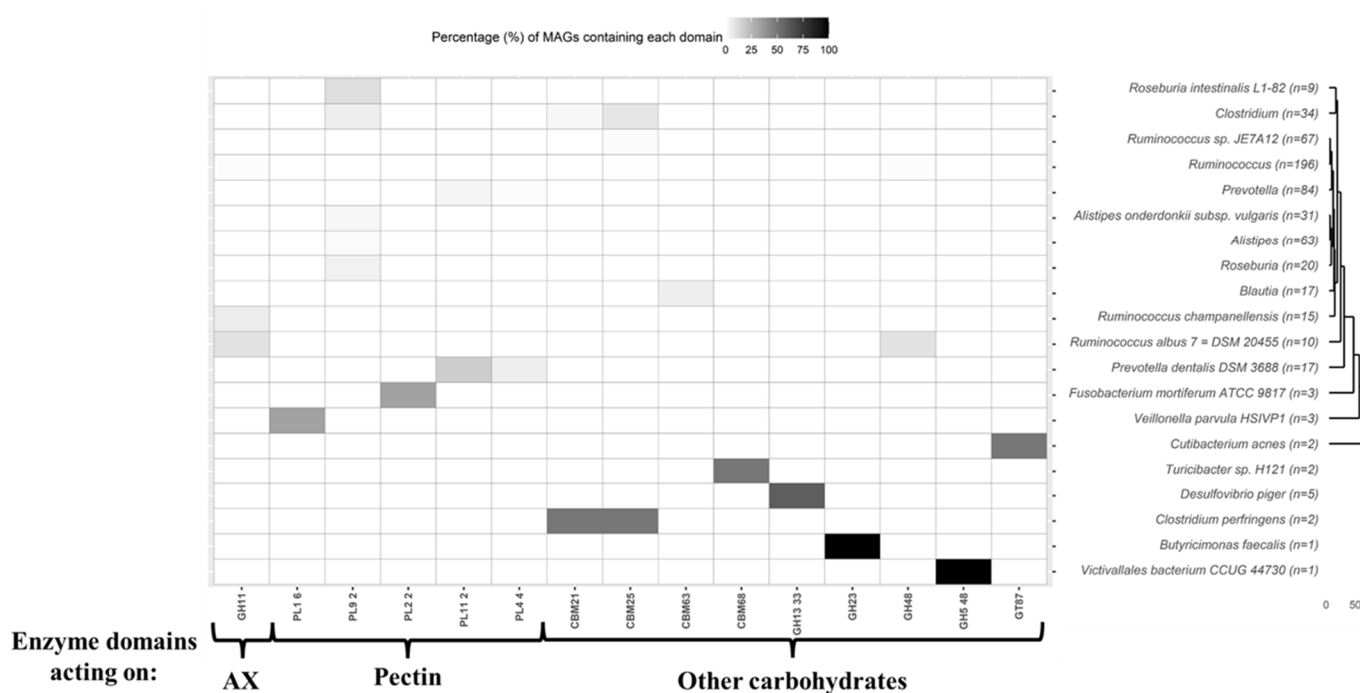

**Figure S2.** Heatmap showing the presence of different glycosidases (indicated as black cells) in metagenome-assembled genomes (MAGs) recovered only from the microbiota of healthy individuals (see Table S6). These enzyme domains were not found in MAGs recovered from metagenome samples from patients with Crohn's disease. The percentage (%) of MAGs containing each functional domain is shown. Specifically, glycosidases capable of degrading arabinoxylan (AX), pectin and other carbohydrates are illustrated. Glycosidase functional domains showing coverage values higher than 0.95 were annotated. Codes corresponding to the Carbohydrate-Active enZymes Database (CAZy) family of each enzyme have been assigned.

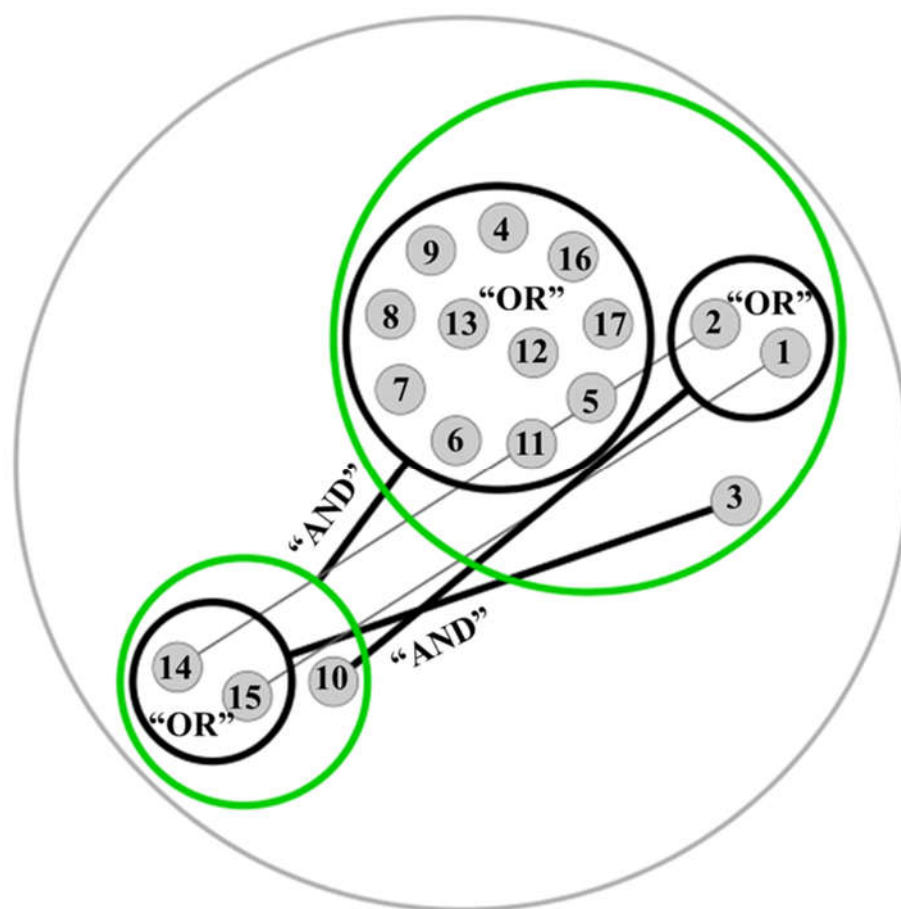

**Figure S3.** Metabolic network illustrating potential cross-feeding mechanisms between meta-genome-assembled genomes (MAGs) recovered from the microbiota of healthy individuals in the presence of arabinoxylan. These MAGs involve beneficial arabinoxylan and pectin degraders (*Akkermansia muciniphila*, *Barnesiella viscericola* DSM 18177, *Paraprevotella xylaniphila* YIT 11841) that were also found in the microbiota of patients with Crohn's disease (see Figure 1). In addition, MAGs of other microorganisms that were not identified in the microbiota of patients with Crohn's disease and might be greatly affected by gut dysbiosis were also chosen. Network nodes (i. e. circles containing different microbial communities showing equivalent metabolic functions) are connected by black lines indicating synergistic relationships between communities and complementary metabolic functions. Metabolic functions of MAGs from different nodes are needed to achieve the maximum number of end-products from arabinoxylan as well as other colonic metabolites (this mutualistic relationship is indicated by the conjunction "AND"). MAGs inside the same node play the same role and could be replaced by other members from the same community (this similar role is indicated by the conjunction "OR"). 1: *A. muciniphila*, 2: *B. viscericola* DSM 18177, 3: *P. xylaniphila* YIT 11841, 4: unidentified *Parabacteroides* species, 5: unidentified *Roseburia* species, 6: *Bifidobacterium adolescentis* ATCC 15703, 7: *Acidaminococcus fermentans* DSM 20731, 8: *Brachyspira murdochii* DSM 12563, 9: *Desulfovibrio piger*, 10: *Faecalitalea cylindroides* T2-87, 11: *Lactobacillus ruminis* ATCC 27782, 12: *Methanobrevibacter smithii* ATCC 35061, 13: *Streptococcus thermophilus*, 14: *Veillonella atypica*, 15: *Clostridioides difficile*, 16: *Lactobacillus mucosae* LM1, 17: *Veillonella parvula* HSIVP1.
